# Supplementary material
Source: PubMed Central journal article supplement (PMC4828661)
Supplement: NIHMS443489-supplement-Supp_Material.pdf [file NIHMS443489-supplement-Supp_Material.pdf]

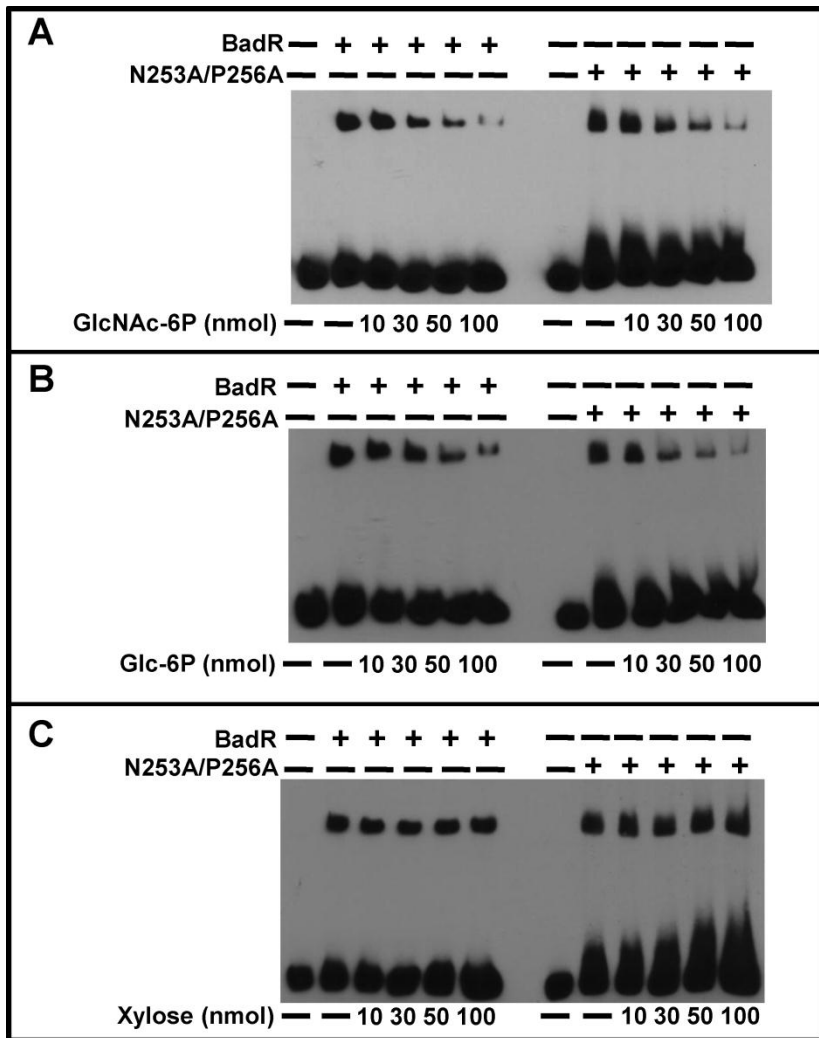

**Fig. S1. Effects of site-directed mutations in the BadR putative inducer binding domain on *rpoS* promoter region binding.** 5' biotinylated *rpoS* promoter region 1 (20 fmols) was incubated with WT or mutant BadR protein, N253A/P255A (135 pmols), in the absence or presence of various sugars (GlcNAc-6P **(A)**, glucose-6P (Glc-6P) **(B)**, and xylose **(C)**). Binding reactions with various sugar concentrations (10, 30, 50, 100mM) determined the influence of each sugar on BadR and N253A/P255A binding to the *rpoS* promoter region.

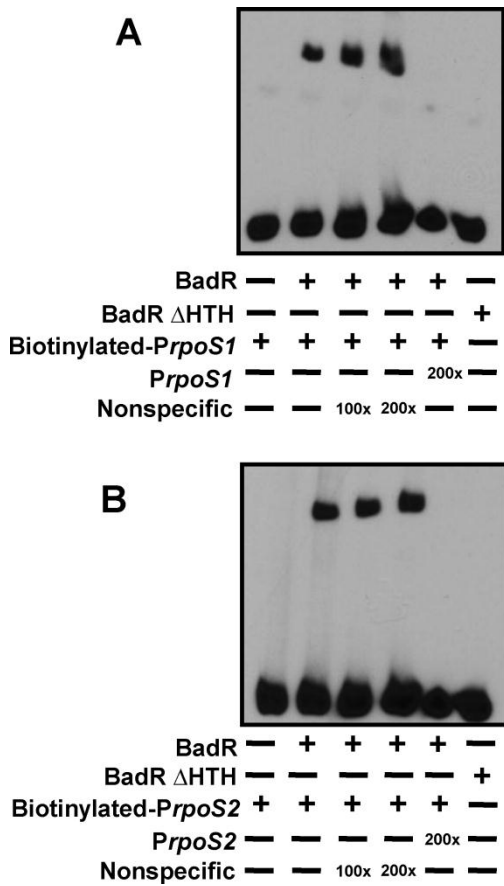

**Fig. S2. Non-specific DNA has no effects on the binding of BadR to the *rpoS* promoter regions.** 5' biotinylated *rpoS* promoter region 1 or *rpoS* promoter region 2 (20 fmols) and purified WT BadR protein (205 pmols) were incubated in the absence or presence of 100- or 200-fold molar excess of unlabeled nonspecific DNA (corresponding to a DNA region downstream of the *rpoS* gene, coordinates 812305-812517). Additional control reactions were done with specific unlabeled promoter regions (200-fold molar excess) or a N' terminal HTH deficient BadR<sub>(734225-735289)</sub> (BadR  $\Delta$  HTH).

Supplementary Table 1. Potential of different sugars to inhibit BadR binding to *rpoS* promoter regions.

| Sugar Concentration (nm) | % Bound       |               |               |               |               |               |               |               |               |               |               |               |
|--------------------------|---------------|---------------|---------------|---------------|---------------|---------------|---------------|---------------|---------------|---------------|---------------|---------------|
|                          | GlcNAc-6P     |               | Glc-6P        |               | Ribose-5P     |               | Xylulose5P    |               | Xylose        |               | Chitobiose    |               |
|                          | <i>PrpoS1</i> | <i>PrpoS2</i> |
| 0                        | 100           | 100           | 100           | 100           | 100           | 100           | 100           | 100           | 100           | 100           | 100           | 100           |
| 10                       | 108           | 101           | 128           | 122           | 93            | 93            | 90            | 87            | 90            | 106           | 90            | 108           |
| 30                       | 87            | 75            | 117           | 81            | 52            | 63            | 49            | 50            | 104           | 123           | 115           | 86            |
| 50                       | 56            | 48            | 56            | 72            | 22            | 48            | 41            | 58            | 106           | 112           | 102           | 82            |
| 100                      | 16            | 4             | 30            | 44            | 13            | 18            | 19            | 21            | 102           | 130           | 96            | 99            |
| 200                      | 4             | 1             | 22            | 20            | 0             | 2             | 0             | 0             | 102           | 142           | 100           | 95            |

\* Densitometry using ImageJ software assessed inhibition of binding by sugars (Schneider, *et al.*, 2012).

† Representative experiment.

‡ The shifted band corresponding to BadR bound to the *rpoS* promoter regions in the absence of sugars was designated as a 100% bound.

Supplementary Table 2. Potential of different sugars to inhibit BadR and BadR mutant (N253A/P255A) binding to *rpoS* promoter region1.

| Sugar Concentration (nm) | % Bound   |             |        |             |        |             |
|--------------------------|-----------|-------------|--------|-------------|--------|-------------|
|                          | GlcNAc-6P |             | Glc-6P |             | Xylose |             |
|                          | BadR      | N253A/P255A | BadR   | N253A/P255A | BadR   | N253A/P255A |
| 0                        | 100       | 100         | 100    | 100         | 100    | 100         |
| 10                       | 94        | 107         | 85     | 84          | 96     | 98          |
| 30                       | 54        | 73          | 74     | 59          | 87     | 99          |
| 50                       | 35        | 50          | 56     | 31          | 95     | 115         |
| 100                      | 12        | 18          | 27     | 14          | 102    | 116         |

\* Densitometry using ImageJ software assessed inhibition of binding by sugars (Schneider, *et al.*, 2012).

† Representative experiment.

‡ The shifted band corresponding to BadR bound to the *rpoS* promoter regions in the absence of sugars was designated as a 100% bound.

Supplementary Table 3. Oligonucleotides used in this study.

| Name                  | Sequence 5' → 3'                                  |
|-----------------------|---------------------------------------------------|
| BadRExpF_NheI         | ACGCGCTAGCATGCAGGGTGAAAAATATGG                    |
| BadRExpR_XhoI         | ACGCCTCGAGATCAATATCTCCTCCTGTCAAAT                 |
| BadRExpF_BamHI        | ACGCGGATCCATGCAGGGTGAAAAATATGG                    |
| BadRExpR_SalI         | ACGCGTGCACATTATCAATATCTCCTCCTGTCAAAT              |
| BadRExpFNoHTH_BamHI   | ACGCGGATCCATGATAAAAAGAAAATCTTTTGATTG              |
| BadRExpRNoHTH_SalI    | ACGCGTGCACTTAATCAATATCTCCTCCAGTCAAATA             |
| BadRExpFNoIBD_BamHI   | ACGCGGATCCATGCAGGGTGAAAAATATGG                    |
| BadRExpFNoIBD_SalI    | ACGCGTGCACTTAACTTTCAAGATTACTGTTAGTG               |
| BadRSDMF_H243A        | TAAATCAGGTATGGTTAGTCCATGATAATTGATTATGA            |
| BadRSDMR_H243A        | TCATAATCAATTATCATGGCACTAACCATACCTGATTTA           |
| BadRSDMF_C254A/C257A  | TATGAGGGAGAAAAAATGCTCCAAGTCTGGTAATAAGGGTTGTGTC    |
| BadRSDMR_C254A/C257A  | GACACAACCCCTTATTACCAGCAGTTGGAGCATTTTTTTCTCCCTCATA |
| BadRSDMF_N253A/P255A  | GATTATGAGGGAGAAAAAGCTTTGTGCAACTTTGTGTAATAAAGG     |
| BadRSDMR_N253A/P255A  | CCTTATTACCACAAGTTGCACAAGCTTTTTCTCCCTCATAATC       |
| BadRDel1F             | CCGGTTGTTTTAATGTCTGTTGAG                          |
| BadRDel2R_Sal         | CAAATAAAATGTCGACTTTTACCCTGCATAATACACCTC           |
| BadRDel3F_Sal         | AGGGTGAAAAAGTTCGACATTTTATTTGACTGGAGGAGATATTG      |
| BadRDel4R             | CTACAAGACTAACAAACATCCCCC                          |
| BadRInternalF         | TCTTTTGATTGAAGTTGGCTTAGG                          |
| BadRInternalR         | GAAGCGGGCCCTACAACAGAAAC                           |
| NagAExpF_NheI         | ACGCGCTAGCATGCCAAATTTTTGCTTATTTAAC                |
| NagAExpF_XhoI         | ACGCCTCGAGGAGATTGTTAAATTTATTTTAGATTC              |
| NagBExpF_NdeI         | ACGCCATATGAGATTAATAATCAGACCCACATAC                |
| NagBExpR_XhoI         | ACGCCTCGAGTTTTAAGTCATTATTAAGTTTTTTTC              |
| XylR2ExpF_NdeI        | ACG CCA TAT GTT GAG GAT AAA TAT GAA AA            |
| XylR2ExpR_XhoI        | ACG CCT CGA GAA ATG AGG TAT TAT TTT G             |
| PtsGExpF_NdeI         | ACGCCATATGATAAATAAGTTTGATTTTAAACTCCG              |
| PtsGExpR_XhoI         | ACGCCTCGAGAGCCTCTAGCAATTTCTCTATTTTCATT            |
| ChbAExpF_NdeI         | ACGCCATATGAATAAAAAAATATATAGCATAG                  |
| ChbAExpF_XhoI         | ACGCCTCGAGTTTTTTTTATTTCTTTTATTATTTTTG             |
| XylulokinaseExpF_NdeI | ACGCCATATGAATGCTCTTAGTATTGATATTG                  |
| XylulokinaseExpR_XhoI | ACGCCTCGAGCCCGTTAACAAATAGACTATAAT3'               |
| BBI41ExpF_NdeI        | ACGCCATATGAATGCTAATAAAGCTTATAAGTGACG              |
| BBI41ExpR_XhoI        | ACGCCTCGAGTTGAATTAAGTTGGAGAATTTTTTC               |
| RpoS1F_813088         | CGCAAGTTTGCAATTTATCATCTTG                         |
| RpoS1R_813282         | ACTTAATCACAAATATTCAAGAAAGGGG                      |
| RpoS2F_813258         | CCTTTCTTGAATATTGTGATTAAG                          |
| RpoS2R_813471         | GCGAACAAAGAGCAAAACAAATG                           |
| NonspecificF_812305   | AAATACAAACATTCATGACCACTGAC                        |
| NonspecificR_812517   | AGAACTTGGAAATATCTATCAGAAAAGT                      |
| RpoSLFq_813419        | AAATACTCCCCCTAAACTCAAAA                           |
| RpoSLqR_813290        | TTCCATGCAAAAAGTGTGC                               |
| RpoSqF                | AGATATGCGGGTAAAGGGTTAAAA                          |
| RpoSqR                | CAGCAGCTCTTATTAATCCCAAGTT                         |
| BBB05qF               | AAGGCCCATGAAGCACACA                               |
| BBB05qR               | GCGTTTTGACAGAGTTTGGATTAG                          |
| BB0240qF              | AGAAATGGATCCTGGCTTAGAAAA                          |
| BBB0240qR             | TCCAGGAACAGCAGGGAAAG                              |
| BBI42qF               | TTATGCGTATAGTTGCTTGGCTGTA                         |
| BBI42qR               | CTCCCCCTTTCGCCAGAATACT                            |
| BBA07qF               | GCAATCCCGACAAGTTTAAATCAA                          |
| BBA07qR               | GCAATCCCGACAAGTTTAAATCAA                          |
| BBP27qF               | CGGCCAAATTAGCAGCGTTA                              |
| BBP27qR               | TTGAAATATCCTGATCCTTGTGCTAGTAA                     |
| BBP28qF               | CAGACCAACAAAAACCACTTTCA                           |
| BBP28qR               | AATCCATCTATCCCCCACTAAG                            |
| BBB29qF               | GGGAACATTGGAAATAAATAACGAA                         |
| BBB29qR               | GGGATCTGCAAGTTGTTTGAAAA                           |
| BBI16qF               | ATGTAAAAAGTATGGAAAAAGAACCTGAAG                    |
| BBI16qR               | CCCCCAATTCAATCCCCCTAA                             |
| BB0019qF              | GAATAAGGCTTTGAATCTTGAGAATGA                       |
| BB0019qR              | GATCCAATACTAATAGCTGAAAACCTAAAA                    |
| BB0198qF              | TGTTTACACCCCGAAGGAGAAG                            |
| BB0198qR              | GCATAAAGAGCTTGATCTCCAATATCT                       |

<sup>a</sup>. Restriction sites are underlined.

q. Quantitative RT-PCR primers.
